# Supplementary material for: Evaluation of a drinking water treatment process involving directly recycling filter backwash water using physico-chemical analysis and toxicity assay
Source: Royal Society of Chemistry journal article supplement (doi:10.1039/c6ra14912j), 2016-01-01
Supplement: c6ra14912j1.pdf [file c6ra14912j1.pdf]

## Supplementary data

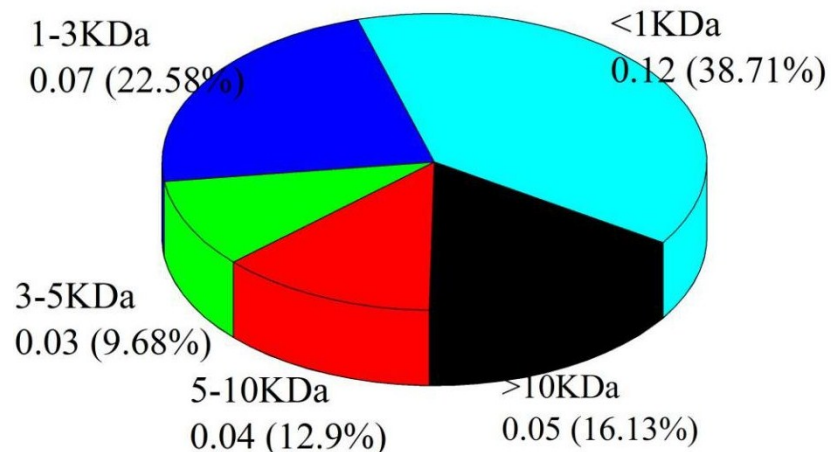

**Fig.S1.** The result of molecular weight fractionation of dissolved organic nitrogen of raw water. The fractionation results of dissolved organic nitrogen by cellulose membranes are shown in **Fig.S1**. The organics nitrogen in portions of >10kDa, 5-10kDa, 3-5kDa, 1-3kDa and <1kDa accounted 16.13%, 12.90%, 9.68%, 22.58% and 38.71% of total organics nitrogen in raw water, respectively. That is to say, the low molecular weight of organic nitrogen (<3kDa) accounted for more than 61%. This result of raw is similar to SFBW.

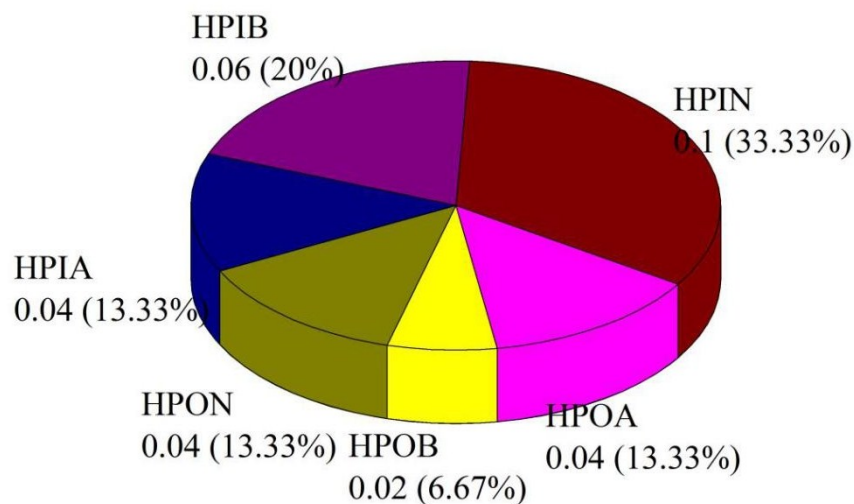

**Fig.S2.** The result of hydrophobic and hydrophilic fractionation of dissolved organic nitrogen of raw water. The fractionation results of dissolved organic nitrogen by resin are shown in **Fig.S2**. The organics nitrogen in portions of HPOA, HPOB, HPON, HPIA, HPIB, HPIN accounted 13.33%, 6.67%, 13.33%, 13.33%, 20%, 33.33% respectively. In general, the hydrophilic fractionation of dissolved organic nitrogen accounted for 66.66%, it further prove that low molecular weight of dissolved organic
